# Supplementary material for: Fine-grain population structure and transmission patterns of Mycobacterium tuberculosis in southern Mozambique, a high TB/HIV burden area
Source: PubMed Central journal article supplement (PMC9455694; doi:10.1099/mgen.0.000844), 2022-07-05

**Supplementary S1. Table 1. Distribution of lineages and sublineages overall and stratify by clustering and likely endemic clades**

| <b>Lineage</b>                 | <b>n= 275</b>            | <b>(%)</b> |                        |            |
|--------------------------------|--------------------------|------------|------------------------|------------|
| 1                              | 97                       | 35.3       |                        |            |
| 2                              | 35                       | 12.7       |                        |            |
| 3                              | 7                        | 2.5        |                        |            |
| 4                              | 136                      | 49.5       |                        |            |
| <b>Sublineages</b>             |                          |            |                        |            |
| L1.1                           | 27                       | 9.8        |                        |            |
| L1.2                           | 70                       | 25.4       |                        |            |
| L2.2.1                         | 35                       | 12.7       |                        |            |
| L3                             | 7                        | 2.6        |                        |            |
| L4.1                           | 34                       | 12.4       |                        |            |
| L4.3.4                         | 64                       | 23.3       |                        |            |
| L4.4                           | 13                       | 4.7        |                        |            |
| L4.10                          | 25                       | 9.1        |                        |            |
| <b>Sublineages<sup>1</sup></b> | <b>Unclustered (116)</b> | <b>(%)</b> | <b>Clustered (159)</b> | <b>(%)</b> |
| L1.1                           | 10                       | 8.6        | 17                     | 10.7       |
| L1.2                           | 25                       | 21.5       | 45                     | 28.3       |
| L2.2                           | 9                        | 7.8        | 26                     | 16.3       |
| L3                             | 4                        | 3.4        | 3                      | 1.9        |
| L4.1                           | 16                       | 13.8       | 18                     | 11.3       |
| L4.3                           | 32                       | 27.6       | 32                     | 20.1       |
| L4.4                           | 9                        | 7.8        | 4                      | 2.5        |
| L4.10                          | 11                       | 9.5        | 14                     | 8.8        |
| <b>Sublineages<sup>2</sup></b> | <b>Non-endemic (208)</b> | <b>(%)</b> | <b>Endemic (67)</b>    | <b>(%)</b> |
| L1.1                           | 27                       | 13.0       | 0                      | 0          |
| L1.2                           | 3                        | 1.4        | 67                     | 100        |
| L2.2                           | 35                       | 16.8       | 0                      | 0          |
| L3                             | 7                        | 3.4        | 0                      | 0          |
| L4.1                           | 34                       | 16.3       | 0                      | 0          |
| L4.3                           | 64                       | 30.8       | 0                      | 0          |
| L4.4                           | 13                       | 6.2        | 0                      | 0.0        |
| L4.10                          | 25                       | 12.0       | 0                      | 0.0        |

<sup>1</sup> p-value=0.09 ; <sup>2</sup> p-value<0.001 Fischer-exact test

**Supplementary S2. Table 2. Summary of BAPs groups**

| <b>BAPS group</b> | <b>Type of clade</b> | <b>lineage</b> | <b>clade name</b> | <b>Number of strains</b> |
|-------------------|----------------------|----------------|-------------------|--------------------------|
| 1                 | endemic              | L1             | E2                | 8                        |
| 2                 | endemic              | L1             | E2                | 15                       |
| 3                 | endemic              | L1             | E2                | 20                       |
| 4                 | unknown              | L2             | Unk4              | 7                        |
| 5                 | non-endemic          | L2             | For2              | 11                       |
| 6                 | unknown              | L2             | Unk5              | 3                        |
| 7                 | unknown              | L2             | Unk6              | 6                        |
| 8                 | unknown              | L2             | Unk7              | 4                        |
| 9                 | unknown              | L2             | Unk8              | 4                        |
| 10                | unknown              | L3             | Unk10             | 5                        |
| 11                | unknown              | L3             | Unk11             | 2                        |
| 12                | endemic              | L1             | E1                | 2                        |
| 13                | endemic              | L1             | E1                | 12                       |
| 14                | endemic              | L1             | E1                | 10                       |
| 15                | unknown              | L1             | Unk3              | 3                        |
| 16                | unknown              | L4             | Unk10             | 4                        |
| 17                | foreign              | L4             | For4              | 16                       |
| 18                | unknown              | L4             | Unk9              | 2                        |
| 19                | non-endemic          | L4             | For3              | 12                       |
| 20                | non-endemic          | L4             | For7              | 32                       |
| 21                | non-endemic          | L4             | For6              | 13                       |
| 22                | non-endemic          | L4             | For8              | 33                       |
| 23                | non-endemic          | L4             | For5              | 25                       |
| 24                | non-endemic          | L1             | For1              | 23                       |
| 25                | unknown              | L1             | Unk1              | 3                        |
| 26                | unknown              | L1             | Not grouped       | 1                        |

**Footnotes:** E: Endemic; For: Foreign (non-endemic); Unk: Unknown, not possible to be classified

**Supplementary S3. Table 3. Median time to the Mozambican Most Recent Common C (MRCA) for each clade and calculation of mean's median times, by BAPS type (endemic(E) or foreign (For))**

|                     |         |         | Estimated time of the Mozambican MRCA |                                |
|---------------------|---------|---------|---------------------------------------|--------------------------------|
| BAPS type           | Lineage | Clade   | Median time (years)                   | 95% HPD <sup>1</sup> (years)   |
| endemic             | L1      | E1      | 1887.73                               | [1877.4 – 1898]                |
| endemic             | L1      | E2      | 1900.61                               | [1891.9 – 1909.1]              |
| <b>Mean Endemic</b> |         |         | <b>1894.17</b>                        | <b>Range [1887.7 – 1900.6]</b> |
| foreign             | L1      | For1-1  | 1932.45                               | [1923.6 – 1941.1]              |
| foreign             | L1      | For1-2  | 2014                                  |                                |
| foreign             | L1      | For1-3  | 2014                                  |                                |
| foreign             | L1      | For1-4  | 2014                                  |                                |
| foreign             | L1      | For1-5  | 2013.57                               | [2012.2 – 2014]                |
| foreign             | L1      | For1-6  | 2014                                  |                                |
| foreign             | L1      | For1-7  | 2013.62                               | [2012.5 – 2014]                |
| foreign             | L2      | For2-1  | 2013.22                               | [2010.5 – 2014]                |
| foreign             | L2      | For2-2  | 1982.07                               | [1966.5 – 1995.4]              |
| foreign             | L2      | For2-3  | 2014                                  |                                |
| foreign             | L4      | For3-1  | 2012.76                               | [2008 – 2014]                  |
| foreign             | L4      | For3-2  | 2014.00                               |                                |
| foreign             | L4      | For3-3  | 2014.00                               |                                |
| foreign             | L4      | For3-4  | 2014.00                               |                                |
| foreign             | L4      | For3-5  | 2014.00                               |                                |
| foreign             | L4      | For3-6  | 2014.00                               |                                |
| foreign             | L4      | For3-7  | 2012.89                               | [2009.2 – 2014]                |
| foreign             | L4      | For3-8  | 2012.82                               | [2009.2 – 2014]                |
| foreign             | L4      | For4-1  | 2008.84                               | [2002.7 – 2013.3]              |
| foreign             | L4      | For4-2  | 2005.50                               | [1998.2 – 2011.3]              |
| foreign             | L4      | For4-3  | 2012.79                               | [2008.7 – 2014]                |
| foreign             | L4      | For4-4  | 2014                                  |                                |
| foreign             | L4      | For4-5  | 2014                                  |                                |
| foreign             | L4      | For4-6  | 2014                                  |                                |
| foreign             | L4      | For4-7  | 2014                                  |                                |
| foreign             | L4      | For4-8  | 2014                                  |                                |
| foreign             | L4      | For5-1  | 1917.98                               | [1885.4 – 1947.3]              |
| foreign             | L4      | For5-2  | 2011.43                               | [2006.2 – 2014]                |
| foreign             | L4      | For5-3  | 2008.65                               | [2002.5 – 2013.1]              |
| foreign             | L4      | For5-4  | 2012.57                               | [2007.8 – 2014]                |
| foreign             | L4      | For5-5  | 2010.99                               | [2005.4 – 2014]                |
| foreign             | L4      | For5-6  | 2011.14                               | [2005.4 – 2014]                |
| foreign             | L4      | For5-7  | 2014                                  |                                |
| foreign             | L4      | For5-8  | 2014                                  |                                |
| foreign             | L4      | For5-9  | 2014                                  |                                |
| foreign             | L4      | For5-10 | 2014                                  |                                |

|         |    |         |         |                   |
|---------|----|---------|---------|-------------------|
| foreign | L4 | For5-11 | 2014    |                   |
| foreign | L4 | For5-12 | 2014    |                   |
| foreign | L4 | For5-13 | 2014    |                   |
| foreign | L4 | For5-14 | 2014    |                   |
| foreign | L4 | For5-15 | 2014    |                   |
| foreign | L4 | For6-1  | 2013.07 | [2009.1 – 2014]   |
| foreign | L4 | For6-3  | 2014    |                   |
| foreign | L4 | For6-4  | 2014    |                   |
| foreign | L4 | For6-5  | 2014    |                   |
| foreign | L4 | For6-6  | 2014    |                   |
| foreign | L4 | For6-7  | 2014    |                   |
| foreign | L4 | For6-8  | 2014    |                   |
| foreign | L4 | For6-9  | 2014    |                   |
| foreign | L4 | For6-10 | 2014    |                   |
| foreign | L4 | For6-11 | 2014    |                   |
| foreign | L4 | For7-1  | 1998.36 | [1987.1 – 2007.2] |
| foreign | L4 | For7-2  | 2008.97 | [2002.8 – 2012.8] |
| foreign | L4 | For7-3  | 2008.33 | [2001.7 – 2012.7] |
| foreign | L4 | For7-4  | 2007.93 | [2000.7 – 2012.6] |
| foreign | L4 | For7-5  | 1876.90 | [1852.9 – 1899.6] |
| foreign | L4 | For7-6  | 2011.74 | [2007 – 2013.8]   |
| foreign | L4 | For7-7  | 2008.95 | [2002.6 – 2013.1] |
| foreign | L4 | For7-8  | 2012.72 | [2007.9 – 2014]   |
| foreign | L4 | For7-9  | 2014    |                   |
| foreign | L4 | For7-10 | 2014    |                   |
| foreign | L4 | For7-11 | 2014    |                   |
| foreign | L4 | For7-12 | 2014    |                   |
| foreign | L4 | For7-13 | 2014    |                   |
| foreign | L4 | For7-14 | 2014    |                   |
| foreign | L4 | For7-15 | 2014    |                   |
| foreign | L4 | For7-16 | 2014    |                   |
| foreign | L4 | For7-17 | 2014    |                   |
| foreign | L4 | For7-18 | 2014    |                   |
| foreign | L4 | For8-1  | 1988.60 | [1973.5 – 2000.9] |
| foreign | L4 | For8-2  | 2004.50 | [1995.7 – 2010.5] |
| foreign | L4 | For8-3  | 2011.88 | [2007.2 – 2014]   |
| foreign | L4 | For8-4  | 2012.88 | [2008.8 – 2014]   |
| foreign | L4 | For8-5  | 2013    | [2009.4 – 2014]   |
| foreign | L4 | For8-6  | 2011.33 | [2005.9 – 2014]   |
| foreign | L4 | For8-7  | 2012.59 | [2014 – 2012.6]   |
| foreign | L4 | For8-8  | 2014    |                   |
| foreign | L4 | For8-9  | 2014    |                   |
| foreign | L4 | For8-10 | 2014    |                   |
| foreign | L4 | For8-11 | 2014    |                   |
| foreign | L4 | For8-12 | 2014    |                   |
| foreign | L4 | For8-13 | 2014    |                   |

|                     |    |         |                |                              |
|---------------------|----|---------|----------------|------------------------------|
| foreign             | L4 | For8-14 | 2014           |                              |
| foreign             | L4 | For8-15 | 2014           |                              |
| foreign             | L4 | For8-16 | 2014           |                              |
| foreign             | L4 | For8-17 | 2014           |                              |
| foreign             | L4 | For8-18 | 2014           |                              |
| foreign             | L4 | For8-19 | 2014           |                              |
| foreign             | L4 | For8-20 | 2014           |                              |
| foreign             | L4 | For8-21 | 2014           |                              |
| foreign             | L4 | For8-22 | 2014           |                              |
| foreign             | L4 | For8-23 | 2014           |                              |
| <b>mean Foreign</b> |    |         | <b>2008.92</b> | <b>Range [1876.9 – 2014]</b> |

**Footnote: <sup>1</sup> 95% HPD: Highest Posterior Density** : the smallest interval that includes 95% of the posterior probability and refers to the 'confidence interval' for each ancestor estimated dates.

## Supplementary S4.

Figure 4.1 BEAST tree for strains belonging to lineage 3

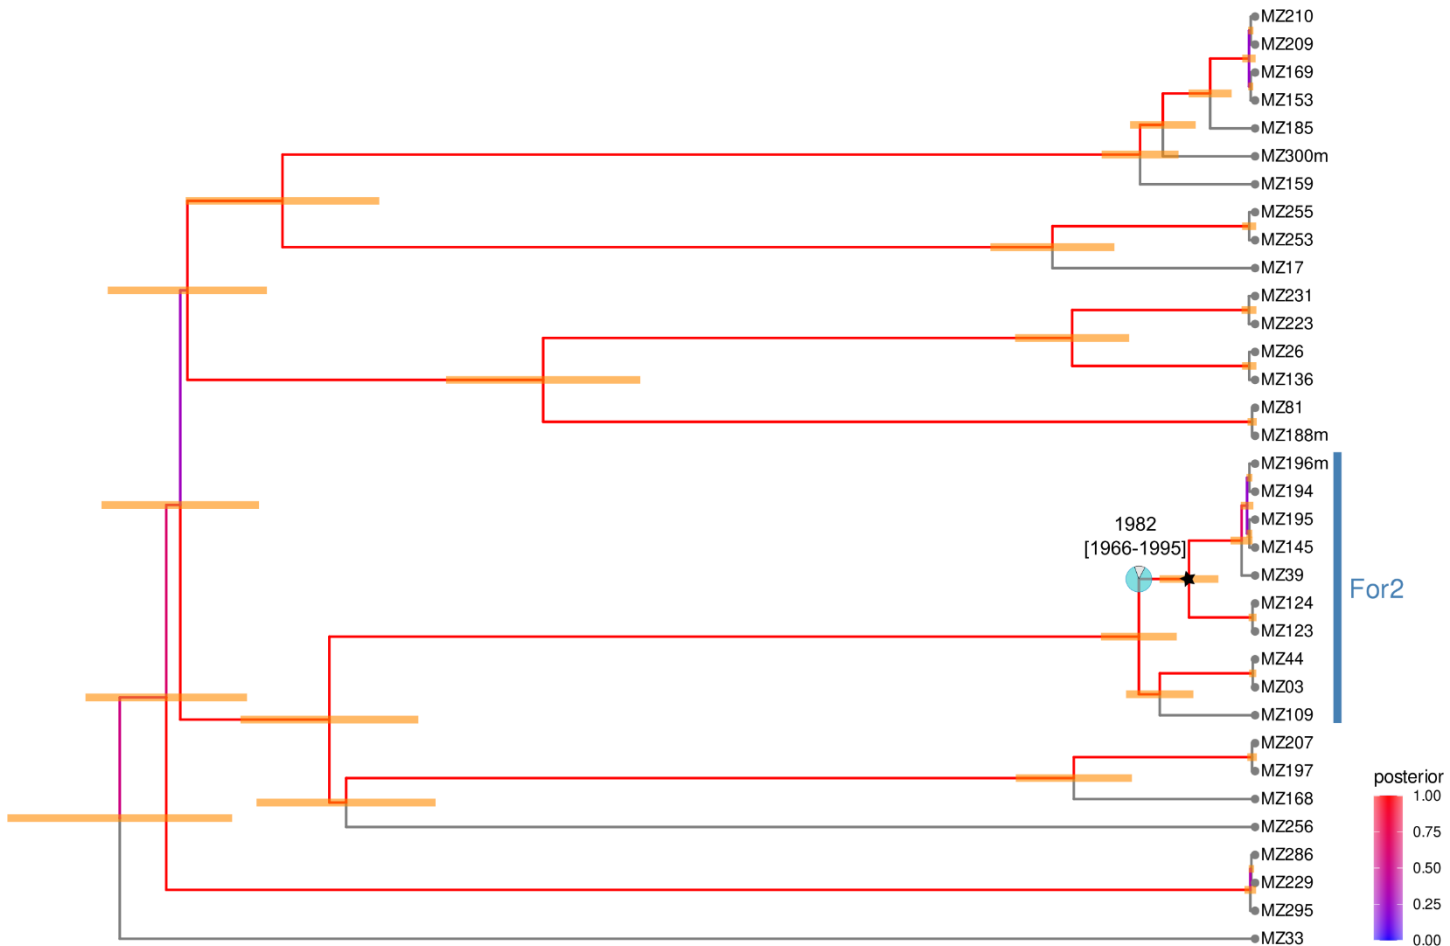

**L3 BEAST tree. Dating results for the MRCA with origin in Mozambique are displayed.** Pie charts represents the probability that the geographical origin of the ancestor was Mozambique (MZ). The 95% Highest Posterior Density (HPD) is drawn as orange intervals and refers to the 'confidence interval' for each ancestor estimated dates. The posterior indicates the probability distribution over the parameter state space. This refers to the strength of the calculated temporal parameter. The red colour (posterior close to one) reveals high strong confidence on estimations performed for the date under the model of evolution applied.

Footnotes: E: Endemic; For: Foreign (non-endemic); 95% Highest Posterior Density

Figure 4.2. BEAST tree lineage 4

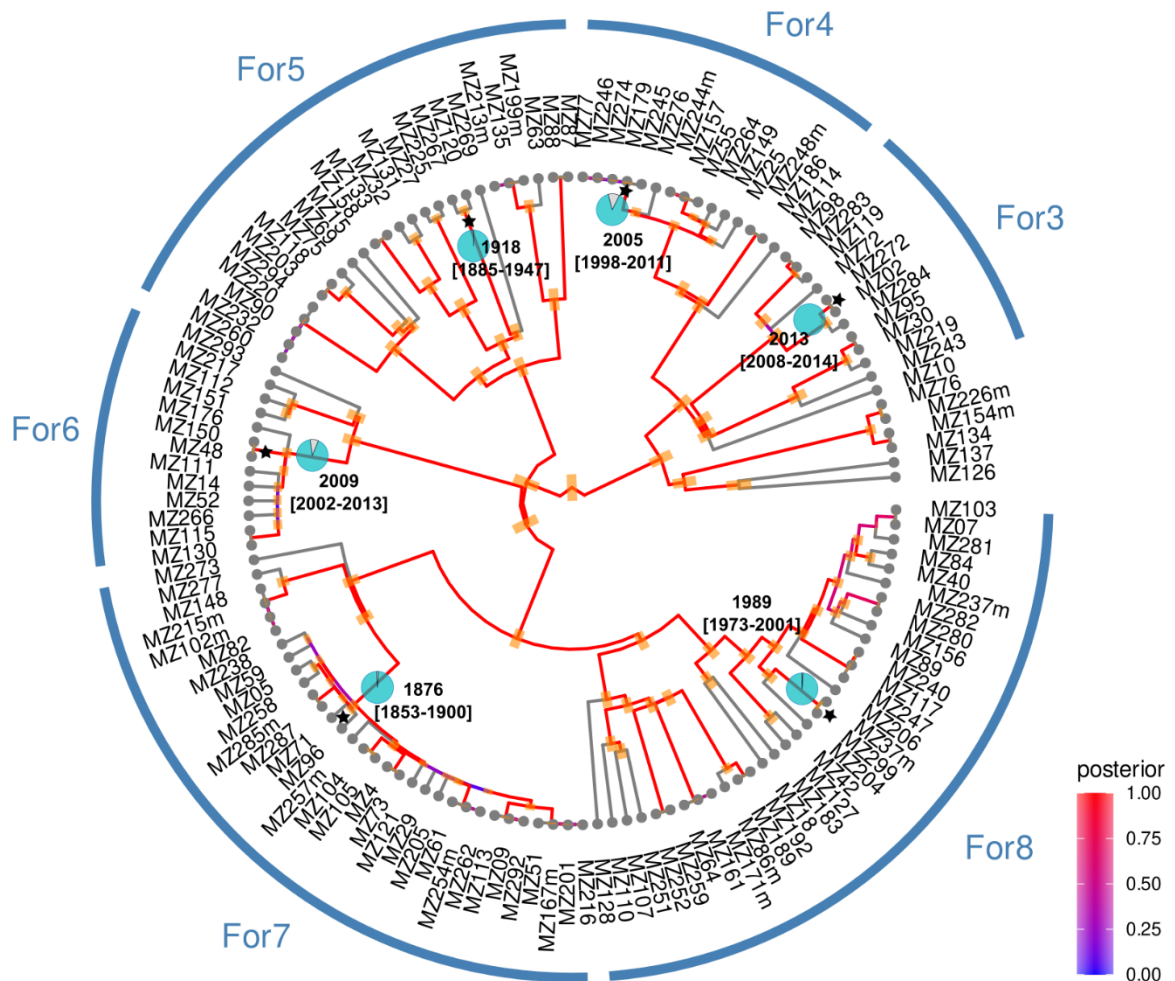

**L4 BEAST tree. Dating results for the MRCA with origin in Mozambique are displayed.** Pie charts represents the probability that the geographical origin of the ancestor was Mozambique (MZ). The 95% Highest Posterior Density (HPD) is drawn as orange intervals and refers to the 'confidence interval' for each ancestor estimated dates. The posterior indicates the probability distribution over the parameter state space. This refers to the strength of the calculated temporal parameter. The red colour (posterior close to one) reveals high strong confidence on estimations performed for the date under the model of evolution applied.

Footnotes: E: Endemic; For: Foreign





**Supplementary S5.** Graphical representation of relation between immunity status of participants and endemicity and data on the proportion of endemic and non-endemic clades stratified by CD4 counts PLHIV: People living with HIV

|                             | Endemic (%) <sup>2</sup> | Non-endemic (%) | p-value <sup>3</sup> |
|-----------------------------|--------------------------|-----------------|----------------------|
| <b>(n=188)</b> <sup>1</sup> |                          |                 | 0·130                |
| <b>&gt;200 cc/mm3</b>       | 14 (25·9)                | 40 (74·1)       |                      |
| <b>&lt;200 cc/mm3</b>       | 25 (31·6)                | 54 (68·4)       |                      |
| <b>Negative</b>             | 9 (16·4)                 | 46 (83·6)       |                      |

**Footnote:** <sup>1</sup>excluding coinfections (8), HIV-status missing (2) and CD4 missing (25); <sup>2</sup>row percentages; <sup>3</sup> Fisher's exact tes

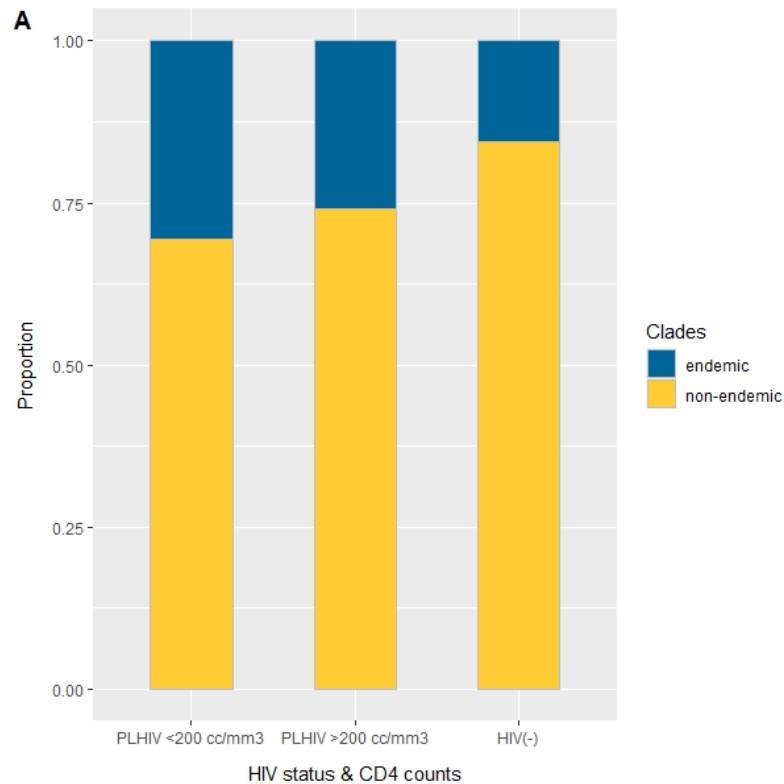

Supplement: mgen-8-844-s001.pdf [file mgen-8-844-s001.pdf]
